# Supplementary material for: Epidemiological and Molecular Approaches for a Fatal Feline Panleukopenia Virus Infection of Captive Siberian Tigers (Panthera tigris altaica) in the Republic of Korea
Source: MDPI journal article supplement (doi:10.3390/ani13182991), 2023-09-21
Supplement: s1 [file s1]

**Table S1.** Information on 578 global FPV sequences collected from GenBank database and amino acid residues at the position of 101, 232 and 562 in the VP2 sequences.

| No. | Host | Year | Country  | Strain         | GenBank<br>accession<br>number | Amino acid residue of<br>VP2 gene |     |     |
|-----|------|------|----------|----------------|--------------------------------|-----------------------------------|-----|-----|
|     |      |      |          |                |                                | 101                               | 232 | 562 |
| 1   | Cat  | 1964 | USA      | 4.us_64        | EU659112                       | T                                 | V   | V   |
| 2   | Cat  | 1967 | USA      | 3.us_67        | EU659111                       | T                                 | V   | V   |
| 3   | Cat  | 1989 | USA      | Philips_Roxane | PVFCAPA                        | I                                 | I   | L   |
| 4   | Cat  | 1989 | USA      | FPV-b_CU4      | PVFCAPB                        | T                                 | I   | V   |
| 5   | Cat  | 1993 | Germany  | FPV-377        | FPU22188                       | T                                 | V   | V   |
| 6   | Cat  | 1995 | Japan    | TU10           | D78584                         | T                                 | V   | V   |
| 7   | Cat  | 1995 | USA      | FPV-23         | FPU22187                       | T                                 | I   | V   |
| 8   | Cat  | 1995 | USA      | FPV-d          | FPU22189                       | T                                 | I   | L   |
| 9   | Cat  | 1996 | Japan    | Fukagawa       | AB000054                       | I                                 | V   | V   |
| 10  | Cat  | 1996 | Japan    | TU8            | AB000070                       | I                                 | I   | V   |
| 11  | Cat  | 1996 | Japan    | FPV-483        | D88286                         | T                                 | V   | V   |
| 12  | Cat  | 1996 | Japan    | Som4           | AB000061                       | T                                 | V   | V   |
| 13  | Cat  | 1996 | Japan    | 94-1           | AB000050                       | T                                 | V   | V   |
| 14  | Cat  | 1996 | Japan    | Som1           | AB000059                       | T                                 | V   | V   |
| 15  | Cat  | 1996 | Japan    | PLI-IV         | D88287                         | T                                 | I   | L   |
| 16  | Cat  | 1996 | Japan    | Obihiro        | AB000056                       | T                                 | V   | V   |
| 17  | Cat  | 1996 | Japan    | AO1            | AB000052                       | T                                 | V   | V   |
| 18  | Cat  | 1996 | Japan    | TU4            | AB000068                       | T                                 | V   | V   |
| 19  | Cat  | 1996 | Japan    | TU2            | AB000066                       | T                                 | V   | V   |
| 20  | Cat  | 1996 | Japan    | TU12           | AB000064                       | T                                 | V   | V   |
| 21  | Cat  | 2001 | Italy    | 198/01         | EU498682                       | T                                 | V   | V   |
| 22  | Cat  | 2001 | Japan    | V211           | AB054227                       | T                                 | V   | V   |
| 23  | Cat  | 2001 | Japan    | V142           | AB054225                       | T                                 | V   | V   |
| 24  | Cat  | 2001 | Japan    | V208           | AB054226                       | T                                 | V   | V   |
| 25  | Cat  | 2002 | Italy    | 103/02         | EU498684                       | T                                 | V   | V   |
| 26  | Cat  | 2003 | Italy    | 150/03         | EU498685                       | T                                 | V   | V   |
| 27  | Cat  | 2003 | Italy    | 189/03         | EU498686                       | T                                 | V   | V   |
| 28  | Cat  | 2003 | Italy    | 300/03         | EU498687                       | T                                 | V   | V   |
| 29  | Cat  | 2004 | Italy    | 134/04-5       | EU498691                       | T                                 | V   | V   |
| 30  | Cat  | 2004 | Italy    | 134/04-2       | EU498689                       | T                                 | V   | V   |
| 31  | Cat  | 2004 | Italy    | 134/04-3       | EU498690                       | T                                 | V   | V   |
| 32  | Cat  | 2004 | Italy    | 143/04         | EU498692                       | T                                 | V   | V   |
| 33  | Cat  | 2004 | Italy    | 134/04-1       | EU498688                       | T                                 | V   | V   |
| 34  | Cat  | 2004 | Italy    | 355/04         | EU498693                       | T                                 | V   | V   |
| 35  | Cat  | 2005 | Italy    | 20/05          | EU498694                       | T                                 | V   | V   |
| 36  | Cat  | 2005 | Italy    | 119/05         | EU498695                       | T                                 | V   | V   |
| 37  | Cat  | 2005 | Portugal | 46912/PT05     | EU221279                       | T                                 | V   | V   |
| 38  | Cat  | 2005 | Portugal | 52171/PT05     | EU221278                       | T                                 | V   | V   |
| 39  | Cat  | 2006 | Italy    | 22/06          | EU498696                       | T                                 | V   | V   |
| 40  | Cat  | 2006 | Italy    | 42/06-G6       | EU498702                       | T                                 | V   | V   |
| 41  | Cat  | 2006 | Italy    | 42/06-G14      | EU498708                       | T                                 | V   | V   |
| 42  | Cat  | 2006 | Italy    | 42/06-G4       | EU498700                       | T                                 | V   | V   |
| 43  | Cat  | 2006 | Italy    | 228/06         | EU498715                       | T                                 | V   | V   |
| 44  | Cat  | 2006 | Italy    | 42/06-G19      | EU498712                       | T                                 | V   | V   |
| 45  | Cat  | 2006 | Italy    | 42/06-G1       | EU498697                       | T                                 | V   | V   |
| 46  | Cat  | 2006 | Italy    | 42/06-17       | EU498710                       | T                                 | V   | V   |
| 47  | Cat  | 2006 | Italy    | 42/06-G7       | EU498703                       | T                                 | V   | V   |
| 48  | Cat  | 2006 | Italy    | 42/06-G10      | EU498705                       | T                                 | V   | V   |
| 49  | Cat  | 2006 | Italy    | 42/06-G8       | EU498704                       | T                                 | V   | V   |

|     |     |      |           |            |          |   |   |   |
|-----|-----|------|-----------|------------|----------|---|---|---|
| 50  | Cat | 2006 | Italy     | 42/06-G2   | EU498698 | T | V | V |
| 51  | Cat | 2006 | Italy     | 42/06-G11  | EU498706 | T | V | V |
| 52  | Cat | 2006 | Italy     | 42/06-G3   | EU498699 | T | V | V |
| 53  | Cat | 2006 | Italy     | 42/06-18   | EU498711 | T | V | V |
| 54  | Cat | 2006 | Italy     | 42/06-12   | EU498707 | T | V | V |
| 55  | Cat | 2006 | Italy     | 42/06-G5   | EU498701 | T | V | V |
| 56  | Cat | 2006 | Italy     | 42/06-G16  | EU498709 | T | V | V |
| 57  | Cat | 2006 | Portugal  | 39897/PT06 | EU221280 | T | V | V |
| 58  | Cat | 2006 | Portugal  | PT020/06   | KT240128 | T | V | V |
| 59  | Cat | 2006 | Portugal  | PT006/06   | KU248461 | T | V | V |
| 60  | Cat | 2006 | Portugal  | PT004/06   | KU248459 | T | V | V |
| 61  | Cat | 2006 | Portugal  | PT005/06   | KU248460 | T | V | V |
| 62  | Cat | 2006 | Portugal  | PT001/06   | KU248456 | T | V | V |
| 63  | Cat | 2006 | Portugal  | PT003/06   | KU248458 | T | V | V |
| 64  | Cat | 2006 | Portugal  | PT002/06   | KU248457 | T | V | V |
| 65  | Cat | 2006 | Portugal  | 31609/PT06 | EU221281 | T | V | V |
| 66  | Cat | 2006 | UK        | 97/06-11   | EU498714 | T | I | V |
| 67  | Cat | 2006 | UK        | 97/06-10   | EU498713 | T | V | V |
| 68  | Cat | 2006 | USA       | kai.us.06  | EU659115 | T | V | V |
| 69  | Cat | 2007 | Argentina | FPV_ARG08  | FJ440714 | T | I | V |
| 70  | Cat | 2007 | Argentina | FPV_ARG05  | FJ440711 | T | I | V |
| 71  | Cat | 2007 | Argentina | FPV_ARG06  | FJ440712 | T | I | V |
| 72  | Cat | 2007 | Argentina | FPV_ARG07  | FJ440713 | T | I | V |
| 73  | Cat | 2007 | China     | XJ-1       | EF988660 | T | V | V |
| 74  | Cat | 2007 | Hungary   | 1335/07    | EU360959 | T | V | V |
| 75  | Cat | 2007 | Hungary   | 933/07     | EU360958 | T | V | V |
| 76  | Cat | 2007 | Italy     | 443/07     | EU498718 | T | V | V |
| 77  | Cat | 2007 | Italy     | 498/07     | EU498720 | T | V | V |
| 78  | Cat | 2007 | Korea     | KF002      | EU252146 | T | V | V |
| 79  | Cat | 2007 | Korea     | KF003      | EU252147 | T | V | V |
| 80  | Cat | 2007 | Korea     | KF001      | EU252145 | T | V | V |
| 81  | Cat | 2007 | Portugal  | PT001/07   | KT240129 | T | V | V |
| 82  | Cat | 2007 | Portugal  | PT002/07   | KU248462 | T | V | V |
| 83  | Cat | 2007 | UK        | 50/07-2    | EU498717 | I | I | L |
| 84  | Cat | 2007 | UK        | 490/07     | EU498719 | T | I | L |
| 85  | Cat | 2007 | UK        | 50/07-1    | EU498716 | T | I | V |
| 86  | Cat | 2008 | China     | ChangC2007 | FJ936171 | T | I | V |
| 87  | Cat | 2008 | Italy     | Purevax    | EU498680 | I | I | L |
| 88  | Cat | 2008 | Italy     | 41/02      | EU498683 | T | V | V |
| 89  | Cat | 2008 | Italy     | Felocell   | EU498681 | T | I | L |
| 90  | Cat | 2008 | Korea     | K3         | HQ184190 | T | V | V |
| 91  | Cat | 2008 | Korea     | K4         | HQ184191 | T | V | V |
| 92  | Cat | 2008 | Korea     | K49        | HQ184195 | T | V | V |
| 93  | Cat | 2008 | Korea     | KS11       | HQ184197 | T | V | V |
| 94  | Cat | 2008 | Korea     | K7         | HQ184192 | T | V | V |
| 95  | Cat | 2008 | Korea     | K22        | HQ184193 | T | V | V |
| 96  | Cat | 2008 | Korea     | K23        | HQ184194 | T | V | V |
| 97  | Cat | 2008 | Korea     | KS58       | HQ184203 | T | V | V |
| 98  | Cat | 2008 | Korea     | KS42       | HQ184200 | T | V | V |
| 99  | Cat | 2008 | Korea     | K2         | HQ184189 | T | V | V |
| 100 | Cat | 2008 | Korea     | KS47       | HQ184202 | T | I | V |
| 101 | Cat | 2008 | Korea     | KS2        | HQ184204 | T | I | V |
| 102 | Cat | 2008 | Korea     | KS23       | HQ184199 | T | V | V |
| 103 | Cat | 2008 | Korea     | K50        | HQ184196 | T | V | V |
| 104 | Cat | 2008 | Korea     | KS45       | HQ184201 | T | V | V |
| 105 | Cat | 2008 | Korea     | KS18       | HQ184198 | T | V | V |

|     |     |      |          |                     |          |   |   |   |
|-----|-----|------|----------|---------------------|----------|---|---|---|
| 106 | Cat | 2008 | Portugal | PT015/08            | KU248463 | T | V | V |
| 107 | Cat | 2008 | Portugal | PT005/08            | KT240130 | T | V | V |
| 108 | Cat | 2008 | Portugal | PT022/08            | KT240131 | T | V | V |
| 109 | Cat | 2011 | Taiwan   | FPV-1               | JX048608 | T | V | V |
| 110 | Cat | 2012 | China    | FPV-GD(12/09/YGP)   | KC473946 | T | V | V |
| 111 | Cat | 2012 | Portugal | PT183/12            | KT240132 | T | V | V |
| 112 | Cat | 2013 | Belgium  | MG132167A           | KP769859 | T | V | V |
| 113 | Cat | 2013 | Portugal | PT083/13            | KT240133 | T | V | V |
| 114 | Cat | 2013 | Portugal | PT210/13            | KT240134 | T | V | V |
| 115 | Cat | 2013 | USA      | ND/979/2013         | KJ813893 | T | V | V |
| 116 | Cat | 2014 | China    | HRB-CS1             | KP280068 | T | V | V |
| 117 | Cat | 2014 | China    | FPV-BJ05            | MH165482 | T | I | L |
| 118 | Cat | 2014 | Portugal | PT264/14            | KT240135 | T | V | V |
| 119 | Cat | 2014 | Portugal | PT265/14            | KU248464 | T | V | V |
| 120 | Cat | 2014 | Portugal | PT271/14            | KT240136 | T | V | V |
| 121 | Cat | 2015 | China    | FPV-BJ04            | MH165481 | T | I | L |
| 122 | Cat | 2015 | Italy    | FPV_IJSSI_3201_1_15 | KX434461 | T | V | V |
| 123 | Cat | 2015 | Italy    | FPV_IJSSI_42807_15  | KX434462 | T | I | V |
| 124 | Cat | 2016 | China    | JL-04/16            | MF541125 | T | V | V |
| 125 | Cat | 2016 | China    | 16JZ0601            | MK671154 | T | V | V |
| 126 | Cat | 2016 | China    | BJ-03/16            | MF541120 | T | V | V |
| 127 | Cat | 2016 | China    | CC-02/16            | MF541121 | T | V | V |
| 128 | Cat | 2016 | China    | GX01                | MG924893 | T | V | V |
| 129 | Cat | 2016 | China    | 16CC0806            | MK671150 | T | V | V |
| 130 | Cat | 2016 | China    | HRB-01/16           | MF541122 | T | V | V |
| 131 | Cat | 2016 | China    | 16CC1106            | MK671151 | T | V | V |
| 132 | Cat | 2016 | China    | 16JL1205            | MK671153 | T | V | V |
| 133 | Cat | 2016 | China    | F2016019            | MH329286 | T | V | V |
| 134 | Cat | 2016 | China    | BC-02/16            | MF541119 | T | V | V |
| 135 | Cat | 2016 | China    | 16SY0601            | MK671155 | T | V | V |
| 136 | Cat | 2016 | China    | 16JL0804            | MK671152 | T | V | V |
| 137 | Cat | 2016 | China    | 16SY0711            | MK671156 | T | V | V |
| 138 | Cat | 2016 | China    | Chengdu-03/2017     | MK266790 | T | V | V |
| 139 | Cat | 2017 | China    | JL-01/17-03         | MF541123 | T | V | V |
| 140 | Cat | 2017 | China    | 17SP0503            | MK671167 | T | V | V |
| 141 | Cat | 2017 | China    | JL-10/17-06         | MF541128 | T | V | V |
| 142 | Cat | 2017 | China    | Beijing-L3/2018     | MK266795 | T | V | V |
| 143 | Cat | 2017 | China    | 17JLSY0701          | MK671165 | T | V | V |
| 144 | Cat | 2017 | China    | JL-07/17-05         | MF541127 | T | V | V |
| 145 | Cat | 2017 | China    | Shenyang-5/2017     | MK266785 | T | V | V |
| 146 | Cat | 2017 | China    | Haerbin-13/2017     | MK266784 | T | V | V |
| 147 | Cat | 2017 | China    | JT-01/17-03         | MF541139 | T | V | V |
| 148 | Cat | 2017 | China    | Haerbin-05/2017     | MK266782 | T | V | V |
| 149 | Cat | 2017 | China    | JL-33/17-05         | MF541135 | T | V | V |
| 150 | Cat | 2017 | China    | 17SY0302            | MK671168 | T | V | V |
| 151 | Cat | 2017 | China    | 17JLSY0901          | MK671166 | T | V | V |
| 152 | Cat | 2017 | China    | JL-12/17-05         | MF541129 | T | V | V |
| 153 | Cat | 2017 | China    | SMU-D4/2017         | MZ442309 | T | V | V |
| 154 | Cat | 2017 | China    | Tianjin-02/2018     | MK266794 | T | V | V |
| 155 | Cat | 2017 | China    | 17DD0501            | MK671160 | T | V | V |
| 156 | Cat | 2017 | China    | JL-34/17-05         | MF541136 | T | V | V |
| 157 | Cat | 2017 | China    | JL-40/17-05         | MF541137 | T | V | V |
| 158 | Cat | 2017 | China    | JL-03/17-05         | MF541124 | T | V | V |
| 159 | Cat | 2017 | China    | 17HRB1001           | MK671163 | T | V | V |
| 160 | Cat | 2017 | China    | 17BC0801            | MK671158 | T | V | V |
| 161 | Cat | 2017 | China    | JL-20/17-05         | MF541131 | T | V | V |

|     |     |      |        |                  |          |   |   |   |
|-----|-----|------|--------|------------------|----------|---|---|---|
| 162 | Cat | 2017 | China  | JL-29/17-05      | MF541134 | T | V | V |
| 163 | Cat | 2017 | China  | JL-19/17-06      | MF541130 | T | V | V |
| 164 | Cat | 2017 | China  | 17BC0704         | MK671157 | T | V | V |
| 165 | Cat | 2017 | China  | 17HRB0505        | MK671162 | T | V | V |
| 166 | Cat | 2017 | China  | JL-47/17-05      | MF541138 | T | V | V |
| 167 | Cat | 2017 | China  | Shenyang-19/2017 | MK266786 | T | V | V |
| 168 | Cat | 2017 | China  | ZJFPV7           | MW495833 | T | V | V |
| 169 | Cat | 2017 | China  | JL-3             | MK295775 | T | V | V |
| 170 | Cat | 2017 | China  | Guiyang01/2017   | MK266788 | T | V | V |
| 171 | Cat | 2017 | China  | 17SY0503         | MK671170 | T | V | V |
| 172 | Cat | 2017 | China  | 17SY0902         | MK671171 | T | V | V |
| 173 | Cat | 2017 | China  | Shenyang-01/2017 | MK266792 | T | V | V |
| 174 | Cat | 2017 | China  | 17CC0308         | MK671159 | T | V | V |
| 175 | Cat | 2017 | China  | 17SY0402         | MK671169 | T | V | V |
| 176 | Cat | 2017 | China  | 17JL0704         | MK671164 | T | V | V |
| 177 | Cat | 2017 | China  | SMU-D3/2017      | MZ442312 | T | V | V |
| 178 | Cat | 2017 | China  | SP-01/16         | MF541140 | T | V | V |
| 179 | Cat | 2017 | China  | JL-24/17-05      | MF541132 | T | V | V |
| 180 | Cat | 2017 | China  | JL-28/17-05      | MF541133 | T | V | V |
| 181 | Cat | 2017 | China  | JL-04/17-03      | MF541126 | T | V | V |
| 182 | Cat | 2017 | China  | ZJFPV5           | MW495831 | T | V | V |
| 183 | Cat | 2017 | China  | Beijing-01/2018  | MK266797 | T | V | V |
| 184 | Cat | 2017 | China  | 17DD0902         | MK671161 | T | V | V |
| 185 | Cat | 2017 | China  | Chengdu-01/2017  | MK266791 | T | V | V |
| 186 | Cat | 2017 | China  | ZJFPV13          | MW495838 | T | V | V |
| 187 | Cat | 2017 | Korea  | Fe-P2            | MN683826 | T | V | V |
| 188 | Cat | 2017 | Korea  | 17D02            | OP153926 | T | V | V |
| 189 | Cat | 2017 | Korea  | 17D01            | OP153925 | T | V | V |
| 190 | Cat | 2017 | Korea  | Gigucheon        | MN400978 | T | V | V |
| 191 | Cat | 2017 | Korea  | Jun              | MN400979 | T | V | V |
| 192 | Cat | 2017 | Korea  | Rara             | MN400980 | T | V | V |
| 193 | Cat | 2018 | Canada | K1830            | OM640096 | T | I | L |
| 194 | Cat | 2018 | China  | 18HRB0801        | MK671178 | T | V | V |
| 195 | Cat | 2018 | China  | Shenyang-05/2017 | MK266798 | T | V | V |
| 196 | Cat | 2018 | China  | DL06-2018        | ON646206 | T | V | V |
| 197 | Cat | 2018 | China  | 18QQHE0503       | MK671186 | T | V | V |
| 198 | Cat | 2018 | China  | 18DD0302         | MK671176 | T | V | V |
| 199 | Cat | 2018 | China  | 18HRB0102        | MK671177 | T | V | V |
| 200 | Cat | 2018 | China  | 18CC0718         | MK671174 | T | V | V |
| 201 | Cat | 2018 | China  | Haerbin-01/2018  | MK266783 | T | V | V |
| 202 | Cat | 2018 | China  | SMU-D53/2018     | MZ442305 | T | V | V |
| 203 | Cat | 2018 | China  | DLC05            | MN419001 | T | V | V |
| 204 | Cat | 2018 | China  | DLC06            | MN419002 | T | V | V |
| 205 | Cat | 2018 | China  | ZJFPV10          | MW495835 | T | V | V |
| 206 | Cat | 2018 | China  | DL03-2018        | ON646203 | T | V | V |
| 207 | Cat | 2018 | China  | 18SY0102         | MK671188 | T | V | V |
| 208 | Cat | 2018 | China  | 18JZ0501         | MK671182 | T | V | V |
| 209 | Cat | 2018 | China  | Shenyang-41/2017 | MK266787 | T | V | V |
| 210 | Cat | 2018 | China  | DLC01            | MN418997 | T | V | V |
| 211 | Cat | 2018 | China  | 18CC0102         | MK671173 | T | V | V |
| 212 | Cat | 2018 | China  | DLC02            | MN418998 | T | V | V |
| 213 | Cat | 2018 | China  | SMU-D28/2018     | MZ442311 | T | V | V |
| 214 | Cat | 2018 | China  | SMU-D50/2018     | MZ442306 | T | V | V |
| 215 | Cat | 2018 | China  | 18LY0701         | MK671183 | T | V | V |
| 216 | Cat | 2018 | China  | Guiyang01/2017   | MK266789 | T | V | V |
| 217 | Cat | 2018 | China  | 18HRB1002        | MK671179 | T | V | V |

|     |     |      |          |                 |          |   |   |   |
|-----|-----|------|----------|-----------------|----------|---|---|---|
| 218 | Cat | 2018 | China    | 18LY0902        | MK671185 | T | V | V |
| 219 | Cat | 2018 | China    | 18LY0801        | MK671184 | T | V | V |
| 220 | Cat | 2018 | China    | 18CC0909        | MK671175 | T | V | V |
| 221 | Cat | 2018 | China    | ZJFPV2          | MW495829 | T | V | V |
| 222 | Cat | 2018 | China    | ZJFPV15         | MW495840 | T | V | V |
| 223 | Cat | 2018 | China    | DL05-2018       | ON646205 | T | V | V |
| 224 | Cat | 2018 | China    | Tanjin-01/2018  | MK266793 | T | V | V |
| 225 | Cat | 2018 | China    | DL07-2018       | ON646207 | T | V | V |
| 226 | Cat | 2018 | China    | DLC04           | MN419000 | T | V | V |
| 227 | Cat | 2018 | China    | ZJFPV4          | MW495830 | T | V | V |
| 228 | Cat | 2018 | China    | DLC03           | MN418999 | T | V | V |
| 229 | Cat | 2018 | China    | DL01-2018       | ON646201 | T | V | V |
| 230 | Cat | 2018 | China    | DL02-2018       | ON646202 | T | V | V |
| 231 | Cat | 2018 | China    | 18JL0602        | MK671181 | T | V | V |
| 232 | Cat | 2018 | China    | 18BC0504        | MK671172 | T | V | V |
| 233 | Cat | 2018 | China    | 18JL0105        | MK671180 | T | V | V |
| 234 | Cat | 2018 | China    | 18SP0701        | MK671187 | T | V | V |
| 235 | Cat | 2018 | China    | Beijing-L4/2018 | MK266796 | T | V | V |
| 236 | Cat | 2018 | China    | ZJFPV8          | MW495834 | T | V | V |
| 237 | Cat | 2018 | China    | ZJFPV14         | MW495839 | T | V | V |
| 238 | Cat | 2018 | China    | SMU-D46/2018    | MZ442307 | T | V | V |
| 239 | Cat | 2018 | China    | Jilin5/2017     | MK266799 | T | V | V |
| 240 | Cat | 2018 | India    | TN/FPV/2018     | MH559110 | T | V | V |
| 241 | Cat | 2018 | Korea    | 18D01           | OP153927 | T | V | V |
| 242 | Cat | 2018 | Thailand | CMU-F12         | MK425504 | T | V | V |
| 243 | Cat | 2018 | Thailand | CMU-F34         | MK425507 | T | V | V |
| 244 | Cat | 2018 | Thailand | CMU-F04         | MK425500 | T | V | V |
| 245 | Cat | 2018 | Thailand | CMU-F13         | MK425505 | T | V | V |
| 246 | Cat | 2018 | Thailand | CMU-F10         | MK425503 | T | I | V |
| 247 | Cat | 2018 | Thailand | 18R217C/TH/2018 | MN127779 | T | V | V |
| 248 | Cat | 2018 | Thailand | CMU-F14         | MK425506 | T | V | V |
| 249 | Cat | 2018 | Thailand | CMU-F09         | MK425502 | T | V | V |
| 250 | Cat | 2018 | Thailand | CMU-F01         | MK425497 | T | V | V |
| 251 | Cat | 2018 | Thailand | CMU-F03         | MK425499 | T | V | V |
| 252 | Cat | 2018 | Thailand | CMU-F02         | MK425498 | T | V | V |
| 253 | Cat | 2018 | Thailand | CMU-F07         | MK425501 | T | V | V |
| 254 | Cat | 2018 | Vietnam  | F3              | MT857285 | T | V | V |
| 255 | Cat | 2018 | Vietnam  | F8              | MT857271 | T | V | V |
| 256 | Cat | 2018 | Vietnam  | F4              | MT857286 | T | V | V |
| 257 | Cat | 2018 | Vietnam  | F6              | MT857269 | T | V | V |
| 258 | Cat | 2018 | Vietnam  | F1              | MT857283 | T | V | V |
| 259 | Cat | 2018 | Vietnam  | F2              | MT857284 | T | V | V |
| 260 | Cat | 2018 | Vietnam  | F5              | MT857268 | T | V | V |
| 261 | Cat | 2018 | Vietnam  | F7              | MT857270 | T | V | V |
| 262 | Cat | 2018 | Vietnam  | F9              | MT857272 | T | V | V |
| 263 | Cat | 2019 | China    | BJ061           | MT270578 | T | V | V |
| 264 | Cat | 2019 | China    | BJ577           | MT270545 | T | V | V |
| 265 | Cat | 2019 | China    | BJ277           | MT270570 | T | V | V |
| 266 | Cat | 2019 | China    | BJ318           | MT270567 | T | V | V |
| 267 | Cat | 2019 | China    | DL17-2019       | ON646215 | T | V | V |
| 268 | Cat | 2019 | China    | BJ663           | MT270534 | T | V | V |
| 269 | Cat | 2019 | China    | BJ379           | MT270563 | T | V | V |
| 270 | Cat | 2019 | China    | BJ319           | MT270566 | T | V | V |
| 271 | Cat | 2019 | China    | BJ372           | MT270564 | T | V | V |
| 272 | Cat | 2019 | China    | BJ006           | MT270585 | T | V | V |
| 273 | Cat | 2019 | China    | BJ588           | MT270543 | T | V | V |

|     |     |      |       |              |          |   |   |   |
|-----|-----|------|-------|--------------|----------|---|---|---|
| 274 | Cat | 2019 | China | BJ020        | MT270583 | T | V | V |
| 275 | Cat | 2019 | China | BJ016        | MT270584 | T | V | V |
| 276 | Cat | 2019 | China | DL12-2019    | ON646210 | T | V | V |
| 277 | Cat | 2019 | China | HBSJZ19-02   | OP471919 | T | V | V |
| 278 | Cat | 2019 | China | DLC14        | MN419011 | T | V | V |
| 279 | Cat | 2019 | China | BJ078        | MT270577 | T | V | V |
| 280 | Cat | 2019 | China | BJ562        | MT270549 | T | V | V |
| 281 | Cat | 2019 | China | BJ574        | MT270546 | T | V | V |
| 282 | Cat | 2019 | China | DLC10        | MN419007 | T | V | V |
| 283 | Cat | 2019 | China | DLC16        | MN419013 | T | V | V |
| 284 | Cat | 2019 | China | BJ025        | MT270582 | T | V | V |
| 285 | Cat | 2019 | China | DLC92        | MN419006 | T | V | V |
| 286 | Cat | 2019 | China | DLC13        | MN419010 | T | V | V |
| 287 | Cat | 2019 | China | DLC08        | MN419004 | T | V | V |
| 288 | Cat | 2019 | China | DLC07        | MN419003 | T | V | V |
| 289 | Cat | 2019 | China | SMU-D74/2019 | MZ442304 | T | V | V |
| 290 | Cat | 2019 | China | SMU-D87/2019 | MZ442303 | T | V | V |
| 291 | Cat | 2019 | China | DLC11        | MN419008 | T | V | V |
| 292 | Cat | 2019 | China | DL20-2019    | ON646218 | T | I | V |
| 293 | Cat | 2019 | China | BJ629        | MT270538 | T | V | V |
| 294 | Cat | 2019 | China | BJ638        | MT270537 | T | V | V |
| 295 | Cat | 2019 | China | BJ624        | MT270540 | T | V | V |
| 296 | Cat | 2019 | China | BJ435        | MT270559 | T | V | V |
| 297 | Cat | 2019 | China | BJ338        | MT270565 | T | V | V |
| 298 | Cat | 2019 | China | BJ128        | MT270574 | T | V | V |
| 299 | Cat | 2019 | China | BJ540        | MT270553 | T | V | V |
| 300 | Cat | 2019 | China | BJ416        | MT270560 | T | V | V |
| 301 | Cat | 2019 | China | ZJFPV16      | MW495841 | T | V | V |
| 302 | Cat | 2019 | China | BJ619        | MT270541 | T | V | V |
| 303 | Cat | 2019 | China | BJ133        | MT270573 | T | V | V |
| 304 | Cat | 2019 | China | BJ572        | MT270547 | T | V | V |
| 305 | Cat | 2019 | China | BJ309        | MT270568 | T | V | V |
| 306 | Cat | 2019 | China | BJ481        | MT270556 | T | V | V |
| 307 | Cat | 2019 | China | ZJFPV11      | MW495836 | T | V | V |
| 308 | Cat | 2019 | China | DLC15        | MN419012 | T | V | V |
| 309 | Cat | 2019 | China | ZJFPV6       | MW495832 | T | V | V |
| 310 | Cat | 2019 | China | BJ625        | MT270539 | T | V | V |
| 311 | Cat | 2019 | China | BJ094        | MT270575 | T | V | V |
| 312 | Cat | 2019 | China | HF1          | MT614366 | T | V | V |
| 313 | Cat | 2019 | China | BJ700        | MT270532 | T | V | V |
| 314 | Cat | 2019 | China | BJ050        | MT270581 | T | V | V |
| 315 | Cat | 2019 | China | BJ565        | MT270548 | T | V | V |
| 316 | Cat | 2019 | China | BJ557        | MT270550 | T | V | V |
| 317 | Cat | 2019 | China | CC19-02      | OP471917 | T | V | V |
| 318 | Cat | 2019 | China | BJ501        | MT270555 | T | V | V |
| 319 | Cat | 2019 | China | JN-FPV-11    | MZ836347 | T | V | V |
| 320 | Cat | 2019 | China | HBSJZ19-01   | OP471918 | T | V | V |
| 321 | Cat | 2019 | China | F-D33        | OL547736 | T | V | V |
| 322 | Cat | 2019 | China | BJ058        | MT270579 | T | V | V |
| 323 | Cat | 2019 | China | BJ698        | MT270533 | T | V | V |
| 324 | Cat | 2019 | China | BJ405        | MT270561 | T | V | V |
| 325 | Cat | 2019 | China | BJ440        | MT270558 | T | V | V |
| 326 | Cat | 2019 | China | BJ396        | MT270562 | T | V | V |
| 327 | Cat | 2019 | China | BJ235        | MT270572 | T | V | V |
| 328 | Cat | 2019 | China | BJ502        | MT270554 | T | V | V |
| 329 | Cat | 2019 | China | BJ552        | MT270552 | T | V | V |

|     |     |      |          |                 |          |   |   |   |
|-----|-----|------|----------|-----------------|----------|---|---|---|
| 330 | Cat | 2019 | China    | BJ644           | MT270536 | T | V | V |
| 331 | Cat | 2019 | China    | BJ554           | MT270551 | T | V | V |
| 332 | Cat | 2019 | China    | BJ662           | MT270535 | T | V | V |
| 333 | Cat | 2019 | China    | BJ461           | MT270557 | T | V | V |
| 334 | Cat | 2019 | China    | F-D34           | OL547735 | T | V | V |
| 335 | Cat | 2019 | China    | BJ051           | MT270580 | T | V | V |
| 336 | Cat | 2019 | China    | BJ308           | MT270569 | T | V | V |
| 337 | Cat | 2019 | China    | BJ582           | MT270544 | T | V | V |
| 338 | Cat | 2019 | China    | BJ728           | MT270531 | T | V | V |
| 339 | Cat | 2019 | China    | BJ594           | MT270542 | T | V | V |
| 340 | Cat | 2019 | China    | F-D35           | OL547733 | T | V | V |
| 341 | Cat | 2019 | China    | DL08-2019       | ON646208 | T | V | L |
| 342 | Cat | 2019 | China    | DL09-2019       | ON646209 | T | V | V |
| 343 | Cat | 2019 | China    | DL13-2019       | ON646211 | T | I | V |
| 344 | Cat | 2019 | China    | DL18-2019       | ON646216 | T | V | V |
| 345 | Cat | 2019 | China    | JN-FPV-12       | MZ836378 | T | V | V |
| 346 | Cat | 2019 | China    | FPV-SD/2019/4   | OK384312 | T | V | V |
| 347 | Cat | 2019 | China    | FPV-SD/2019/2   | OK384310 | T | V | V |
| 348 | Cat | 2019 | China    | FPV-SD/2019/5   | OK384313 | T | V | V |
| 349 | Cat | 2019 | China    | FPV-SD/2019/3   | OK384311 | T | V | V |
| 350 | Cat | 2019 | China    | FPV-SD/2019/6   | OK384314 | T | V | V |
| 351 | Cat | 2019 | China    | DL14-2019       | ON646212 | T | V | V |
| 352 | Cat | 2019 | China    | DL16-2019       | ON646214 | T | V | V |
| 353 | Cat | 2019 | China    | DLC12           | MN419009 | T | V | V |
| 354 | Cat | 2019 | China    | BJ090           | MT270576 | T | V | V |
| 355 | Cat | 2019 | China    | DLC91           | MN419005 | T | I | L |
| 356 | Cat | 2019 | China    | DL19-2019       | ON646217 | T | I | L |
| 357 | Cat | 2019 | China    | DL15-2019       | ON646213 | T | V | V |
| 358 | Cat | 2019 | China    | ZJFPV12         | MW495837 | T | V | V |
| 359 | Cat | 2019 | China    | BJ240           | MT270571 | T | V | V |
| 360 | Cat | 2019 | China    | FPV-SX          | MT892650 | T | V | V |
| 361 | Cat | 2019 | Egypt    | EGY/2019/39-566 | OM937916 | T | V | V |
| 362 | Cat | 2019 | India    | CV3             | MT078770 | T | V | V |
| 363 | Cat | 2019 | India    | BCC1            | MT078767 | T | V | V |
| 364 | Cat | 2019 | India    | CPF6            | MT078769 | T | V | V |
| 365 | Cat | 2019 | India    | PDC3            | MT078771 | T | V | V |
| 366 | Cat | 2019 | India    | BCC13           | MT078768 | T | V | V |
| 367 | Cat | 2019 | Korea    | 19D02           | OP153929 | T | V | V |
| 368 | Cat | 2019 | Korea    | 19D01           | OP153928 | T | V | V |
| 369 | Cat | 2019 | Korea    | 19D04           | OP153931 | T | V | V |
| 370 | Cat | 2019 | Korea    | 19D03           | OP153930 | T | V | V |
| 371 | Cat | 2019 | Korea    | 19D05           | OP153932 | T | V | L |
| 372 | Cat | 2019 | Thailand | 19R124C/TH/2019 | MN127781 | T | I | L |
| 373 | Cat | 2019 | Thailand | 19R81C/TH/2019  | MN127780 | T | I | V |
| 374 | Cat | 2019 | UK       | Cat_1           | MW926314 | T | I | L |
| 375 | Cat | 2019 | UK       | Cat_3           | MW926316 | T | V | V |
| 376 | Cat | 2019 | Vietnam  | F10             | MT857273 | T | V | V |
| 377 | Cat | 2019 | Vietnam  | F11             | MT857274 | T | V | V |
| 378 | Cat | 2019 | Vietnam  | F12             | MT857275 | T | V | V |
| 379 | Cat | 2019 | Vietnam  | F13             | MT857276 | T | V | V |
| 380 | Cat | 2019 | Vietnam  | F19             | MT857282 | T | V | V |
| 381 | Cat | 2019 | Vietnam  | F14             | MT857277 | T | V | V |
| 382 | Cat | 2019 | Vietnam  | F15             | MT857278 | T | V | V |
| 383 | Cat | 2019 | Vietnam  | F18             | MT857281 | T | V | V |
| 384 | Cat | 2019 | Vietnam  | F17             | MT857280 | T | V | V |
| 385 | Cat | 2019 | Vietnam  | F16             | MT857279 | T | V | V |

|     |     |      |        |                 |          |   |   |   |
|-----|-----|------|--------|-----------------|----------|---|---|---|
| 386 | Cat | 2020 | China  | ZJFPV23         | MW495848 | T | V | V |
| 387 | Cat | 2020 | China  | SH-118          | MW017625 | T | V | V |
| 388 | Cat | 2020 | China  | TZ-FPV-108      | MZ836369 | T | V | V |
| 389 | Cat | 2020 | China  | TZ-FPV-99       | MZ836371 | T | V | V |
| 390 | Cat | 2020 | China  | JN-FPV-92       | MZ836374 | T | V | V |
| 391 | Cat | 2020 | China  | TZ-FPV-193      | MZ836360 | T | V | V |
| 392 | Cat | 2020 | China  | JN-FPV-91       | MZ836375 | T | V | V |
| 393 | Cat | 2020 | China  | TZ-FPV-195      | MZ836359 | T | V | V |
| 394 | Cat | 2020 | China  | TZ-FPV-104      | MZ836370 | T | V | V |
| 395 | Cat | 2020 | China  | JSYZ-122        | MW017628 | T | V | V |
| 396 | Cat | 2020 | China  | TZ-FPV-122      | MZ836366 | T | V | V |
| 397 | Cat | 2020 | China  | TZ-FPV-148      | MZ836362 | T | V | V |
| 398 | Cat | 2020 | China  | JN-FPV-87       | MZ836377 | T | V | V |
| 399 | Cat | 2020 | China  | JN-FPV-90       | MZ836376 | T | V | V |
| 400 | Cat | 2020 | China  | TZ-FPV-124      | MZ836365 | T | V | V |
| 401 | Cat | 2020 | China  | SH-121          | MW017627 | T | V | V |
| 402 | Cat | 2020 | China  | TZ-FPV-242      | MZ836351 | T | V | V |
| 403 | Cat | 2020 | China  | cf094par01-8    | MZ357120 | T | V | V |
| 404 | Cat | 2020 | China  | F-A             | OL547737 | T | V | V |
| 405 | Cat | 2020 | China  | ZJFPV20         | MW495845 | T | V | V |
| 406 | Cat | 2020 | China  | FPV-SH2001      | MW650831 | T | V | V |
| 407 | Cat | 2020 | China  | TZ-FPV-239      | MZ836354 | T | V | V |
| 408 | Cat | 2020 | China  | JSYZ-168        | MW791426 | T | V | V |
| 409 | Cat | 2020 | China  | ZJHN-126        | MW017631 | T | V | V |
| 410 | Cat | 2020 | China  | SH-120          | MW017626 | T | V | V |
| 411 | Cat | 2020 | China  | TZ-FPV-112      | MZ836368 | T | V | V |
| 412 | Cat | 2020 | China  | SMU-F33/2020    | MZ442302 | T | V | V |
| 413 | Cat | 2020 | China  | ZJFPV17         | MW495842 | T | V | V |
| 414 | Cat | 2020 | China  | JSYZ-124        | MW017630 | T | V | V |
| 415 | Cat | 2020 | China  | TZ-FPV-235      | MZ836358 | T | V | V |
| 416 | Cat | 2020 | China  | JN-FPV-96       | MZ836373 | T | V | V |
| 417 | Cat | 2020 | China  | SMU-SC20-6/2020 | MZ442314 | T | V | V |
| 418 | Cat | 2020 | China  | F-D             | OL547732 | T | V | V |
| 419 | Cat | 2020 | China  | TZ-FPV-133      | MZ836364 | T | V | V |
| 420 | Cat | 2020 | China  | ZJFPV18         | MW495843 | T | V | V |
| 421 | Cat | 2020 | China  | TZ-FPV-240      | MZ836353 | T | V | V |
| 422 | Cat | 2020 | China  | FPV-SH2003      | MW811187 | T | V | V |
| 423 | Cat | 2020 | China  | JSYZ-169        | MW791427 | T | V | V |
| 424 | Cat | 2020 | China  | SMU-SC20-2/2020 | MZ442313 | T | V | V |
| 425 | Cat | 2020 | China  | TZ-FPV-185      | MZ836361 | T | V | V |
| 426 | Cat | 2020 | China  | ZJFPV19         | MW495844 | T | V | V |
| 427 | Cat | 2020 | China  | FPV-SH2002      | MW659466 | T | V | V |
| 428 | Cat | 2020 | China  | TZ-FPV-241      | MZ836352 | T | V | V |
| 429 | Cat | 2020 | China  | TZ-FPV-238      | MZ836355 | T | V | V |
| 430 | Cat | 2020 | China  | TZ-FPV-135      | MZ836363 | T | V | V |
| 431 | Cat | 2020 | China  | JSYZ-123        | MW017629 | T | V | V |
| 432 | Cat | 2020 | China  | TZ-FPV-237      | MZ836356 | T | V | V |
| 433 | Cat | 2020 | China  | F-E             | OL547734 | T | V | V |
| 434 | Cat | 2020 | China  | ZJFPV22         | MW495847 | T | V | V |
| 435 | Cat | 2020 | China  | TZ-FPV-119      | MZ836367 | T | V | V |
| 436 | Cat | 2020 | China  | ZJFPV21         | MW495846 | T | V | V |
| 437 | Cat | 2020 | China  | TZ-FPV-243      | MZ836350 | T | V | V |
| 438 | Cat | 2020 | China  | TZ-FPV-236      | MZ836357 | T | V | V |
| 439 | Cat | 2020 | Turkey | Barut           | MZ391096 | T | V | V |
| 440 | Cat | 2020 | Turkey | kucuk           | MZ391097 | T | V | V |
| 441 | Cat | 2021 | China  | Yanji27         | OM918773 | T | V | V |



|     |     |      |           |                          |          |   |   |   |
|-----|-----|------|-----------|--------------------------|----------|---|---|---|
| 442 | Cat | 2021 | China     | F-18                     | MZ913313 | T | V | V |
| 443 | Cat | 2021 | China     | Yanji4                   | OM885374 | T | V | V |
| 444 | Cat | 2021 | China     | Yanji25                  | OM918772 | T | V | V |
| 445 | Cat | 2021 | China     | Yanji26                  | OM918784 | T | V | V |
| 446 | Cat | 2021 | China     | Yanji10                  | OM885379 | T | V | V |
| 447 | Cat | 2021 | China     | Yanji33                  | OM918779 | T | V | V |
| 448 | Cat | 2021 | China     | Yanji31                  | OM918777 | T | V | V |
| 449 | Cat | 2021 | China     | Yanji                    | OM212011 | T | V | V |
| 450 | Cat | 2021 | China     | Yanji24                  | OM918771 | T | V | V |
| 451 | Cat | 2021 | China     | Yanji17                  | OM918783 | T | V | V |
| 452 | Cat | 2021 | China     | Yanji29                  | OM918775 | T | V | V |
| 453 | Cat | 2021 | China     | Yanji28                  | OM918774 | T | V | V |
| 454 | Cat | 2021 | China     | Yanji5                   | OM885375 | T | V | V |
| 455 | Cat | 2021 | China     | Yanji12                  | OM885381 | T | V | V |
| 456 | Cat | 2021 | China     | Yanji13                  | OM885382 | T | V | V |
| 457 | Cat | 2021 | China     | Yanji18                  | OM885384 | T | V | V |
| 458 | Cat | 2021 | China     | Yanji37                  | OM918785 | T | V | V |
| 459 | Cat | 2021 | China     | F-C                      | OL547731 | T | V | V |
| 460 | Cat | 2021 | China     | Yanji38                  | OM918782 | T | V | V |
| 461 | Cat | 2021 | China     | Yanji35                  | OM918780 | T | V | V |
| 462 | Cat | 2021 | China     | JSNJ-21G5                | OP796709 | T | V | V |
| 463 | Cat | 2021 | China     | SH-21D2                  | OP796706 | T | V | V |
| 464 | Cat | 2021 | China     | JSNJ-21G4                | OP796708 | T | G | V |
| 465 | Cat | 2021 | China     | SH-21D4                  | OP796707 | T | V | V |
| 466 | Cat | 2021 | China     | Yanji32                  | OM918778 | T | V | V |
| 467 | Cat | 2021 | China     | Yanji9                   | OM885378 | T | V | V |
| 468 | Cat | 2021 | China     | Yanji15                  | OM885383 | T | V | V |
| 469 | Cat | 2021 | China     | Yanji8                   | OM885377 | T | V | V |
| 470 | Cat | 2021 | China     | Yanji30                  | OM918776 | T | V | V |
| 471 | Cat | 2021 | China     | Yanji6                   | OM885376 | T | V | V |
| 472 | Cat | 2021 | China     | Yanji3                   | OM885373 | T | V | V |
| 473 | Cat | 2021 | China     | Yanji11                  | OM885380 | T | V | V |
| 474 | Cat | 2021 | Egypt     | EGY/2021/139-188         | OM638043 | T | V | V |
| 475 | Cat | 2021 | Italy     | ITA/2021/164-1           | OM638042 | T | V | V |
| 476 | Cat | 2022 | China     | ZJHN-2207                | OP796715 | T | V | V |
| 477 | Cat | 2022 | China     | ZJHN-2206                | OP796714 | T | V | V |
| 478 | Cat | 2022 | China     | ZJHZ-2204                | OP796712 | T | V | V |
| 479 | Cat | 2022 | China     | ZJHN-2205                | OP796713 | T | V | V |
| 480 | Cat | 2022 | China     | ZJHN-2208                | OP796716 | T | V | V |
| 481 | Cat | 2022 | China     | ZJHZ-2203                | OP796711 | T | V | V |
| 482 | Cat | 2022 | China     | ZJHZ-2202                | OP796710 | T | V | V |
| 483 | Cat | *    | *         | RCP_vaccine              | ON605652 | I | I | L |
| 484 | Dog | 2017 | Viet_Nam  | HN40AA                   | MK357740 | T | V | V |
| 485 | Dog | 2017 | Viet_Nam  | HN3                      | MK357739 | T | V | V |
| 486 | Dog | 2017 | Viet_Nam  | HN39AA                   | MK357738 | T | V | V |
| 487 | Dog | 2018 | Korea     | 18Q234-1                 | MW035310 | T | V | V |
| 488 | Dog | 2018 | Viet_Nam  | HN10                     | MK357741 | T | V | V |
| 489 | Dog | 2018 | Viet_Nam  | HN7                      | MK357743 | T | V | V |
| 490 | Dog | 2018 | Viet_Nam  | HN41AA                   | MK357742 | T | V | V |
| 491 | Dog | 2019 | Australia | AP_Roseworthy/SA/5371/20 | MZ362883 | T | V | V |
| 492 | Dog | 2019 | China     | C-1                      | MZ913317 | T | V | V |
| 493 | Dog | 2019 | China     | C-F9                     | MZ913315 | T | V | V |
| 494 | Dog | 2019 | China     | C-F88                    | MZ913316 | T | V | V |
| 495 | Dog | 2019 | China     | C-9                      | MZ913319 | T | V | V |
| 496 | Dog | 2019 | China     | C-DY6                    | OK128324 | T | V | V |
| 497 | Dog | 2019 | China     | JSYZ-85                  | MW017596 | T | V | V |

|     |                      |      |          |                                 |          |   |   |   |
|-----|----------------------|------|----------|---------------------------------|----------|---|---|---|
| 498 | Dog                  | 2019 | China    | C-4                             | MZ913318 | T | V | V |
| 499 | Dog                  | 2019 | Korea    | 19SP_CK-8                       | MW035309 | T | V | V |
| 500 | Dog                  | 2020 | China    | ZJHN-135                        | MW017616 | T | V | V |
| 501 | Dog                  | 2020 | China    | ZJHN-138                        | MW017618 | T | V | V |
| 502 | Dog                  | 2021 | China    | D7                              | OK128325 | T | V | V |
| 503 | Dog                  | 2021 | China    | D13                             | MZ913314 | T | V | V |
| 504 | Tiger                | 1999 | China    | FPV-G                           | MG764510 | T | I | V |
| 505 | Tiger                | 2005 | China    | GT-2                            | AY955826 | I | I | V |
| 506 | Tiger                | 2006 | Portugal | Tiger/PT06                      | EF418568 | T | V | V |
| 507 | Tiger                | 2007 | China    | HT-262                          | EU697383 | T | V | V |
| 508 | Tiger                | 2007 | China    | HT-374                          | EU697386 | T | V | V |
| 509 | Tiger                | 2007 | China    | HT-290                          | EU697384 | T | V | V |
| 510 | Tiger                | 2007 | China    | HT-163                          | EU697387 | T | V | V |
| 511 | Tiger                | 2008 | China    | FJ405225                        | FJ405225 | T | V | V |
| 512 | Tiger                | 2016 | China    | HN-ZZ1                          | KX685354 | T | V | V |
| 513 | Tiger                | 2017 | China    | CHJL-Siberian_Tiger-01/2017     | MK982094 | T | V | V |
| 514 | Tiger                | 2019 | China    | MHS2019                         | MN908257 | T | V | V |
| 515 | Tiger                | 2023 | Korea    | KTPV-2305                       | OR365078 | T | V | V |
| 516 | Raccoon              | 1978 | USA      | TX/Rac1.2/78                    | JN867596 | T | I | V |
| 517 | Raccoon              | 1978 | USA      | TX/Rac3/1978                    | KM624023 | T | I | V |
| 518 | Raccoon              | 1978 | USA      | TX/Rac2.2/78                    | JN867595 | T | I | V |
| 519 | Raccoon              | 1990 | USA      | NJ/RPV-6/90                     | JN867594 | T | V | V |
| 520 | Raccoon              | 2010 | Canada   | RC9/BC_2010                     | MF069446 | T | V | V |
| 521 | Raccoon              | 2010 | USA      | CA/208-A/10                     | JN867593 | T | V | V |
| 522 | Raccoon              | 2012 | USA      | MA/190/2012                     | KJ813894 | T | V | V |
| 523 | Raccoon              | 2012 | USA      | MA/188/2012                     | KJ813895 | T | V | V |
| 524 | Raccoon              | 2012 | USA      | GA/1/12                         | JX475270 | T | I | L |
| 525 | Raccoon              | 2015 | Canada   | RC6/BC_2015                     | MF069445 | T | V | V |
| 526 | Raccoon              | 2016 | Canada   | RC18/BC_2016                    | MF069447 | T | V | V |
| 527 | Lion                 | 1989 | USA      | 8b.us_89                        | EU659114 | I | V | V |
| 528 | Lion                 | 1989 | USA      | 8a.us_89                        | EU659113 | T | V | V |
| 529 | Lion                 | 2006 | Portugal | Lion/PT06                       | EF418569 | T | V | V |
| 530 | Lion                 | 2015 | China    | FPV-L                           | MG764511 | T | V | V |
| 531 | Lion                 | 2020 | China    | HNZZ2                           | MZ005633 | T | V | V |
| 532 | Giant panda          | 2018 | China    | gpfe267par01-12                 | MZ357122 | T | V | V |
| 533 | Giant panda          | 2018 | China    | Giant_panda/CD/2018             | MZ322607 | T | V | V |
| 534 | Giant panda          | 2018 | China    | Giant_panda/CD/2018             | MW091487 | T | V | V |
| 535 | Giant panda          | 2018 | China    | Giant_panda/CD-2/2018           | MW091486 | T | V | V |
| 536 | Giant panda          | 2020 | China    | AMPV2020                        | MZ712026 | T | V | V |
| 537 | Red panda            | 2020 | China    | rpfe013par01-5                  | MZ357119 | T | V | V |
| 538 | Giant panda          | 2020 | China    | gpfe016par01-5                  | MW331496 | T | V | V |
| 539 | American mink        | 2017 | Canada   | MIVI-21/BC_2017                 | MN862746 | T | V | V |
| 540 | American mink        | 2018 | Canada   | MIVI-34/BC_2018                 | MN862743 | T | V | V |
| 541 | American mink        | 2019 | Canada   | MIVI-72/BC_2019                 | MN862747 | T | V | V |
| 542 | American pine marten | 2016 | Canada   | MAVI-36/BC_2016                 | MN862744 | T | V | V |
| 543 | American pine marten | 2017 | Canada   | MAHG-3/BC_2017                  | MN862745 | T | I | L |
| 544 | Arctic fox           | 1983 | Finland  | BFPV                            | MN451652 | T | V | V |
| 545 | Arctic fox           | 1995 | USA      | BFPV-1,1983                     | FPU22185 | T | V | V |
| 546 | Asian palm civet     | 2007 | Hungary  | 389/07                          | EU145593 | T | V | V |
| 547 | Badger               | 2019 | Italy    | 245-1478_FPLV_BADGER_2019_ITALY | MT274378 | T | V | V |
| 548 | Banded linsang       | 2015 | Thailand | FPV-VT01                        | MH669800 | T | V | V |
| 549 | Blue fox             | 2008 | China    | BFPV                            | GQ857595 | I | I | L |
| 550 | Cheetah              | 2019 | China    | SY-01/2019                      | MT178243 | T | V | V |
| 551 | Egyptian mongoose    | 2009 | Portugal | PT09                            | JF422105 | T | V | V |
| 552 | Jaguar               | 1986 | China    | HH-1/86                         | KX900570 | T | V | V |
| 553 | Monkey               | 2008 | China    | BJ-22                           | FJ231389 | I | I | V |

|     |               |      |           |                                 |          |   |   |   |
|-----|---------------|------|-----------|---------------------------------|----------|---|---|---|
| 554 | Puma concolor | 2010 | USA       | CO/977/10                       | JX475254 | T | V | V |
| 555 | Puma concolor | 2010 | USA       | CO/952/10                       | JX475245 | T | V | V |
| 556 | Puma concolor | 2010 | USA       | CO/545/10                       | JX475259 | T | V | V |
| 557 | Puma concolor | 2010 | USA       | CO/546/10                       | JX475253 | T | I | L |
| 558 | Puma concolor | 2011 | USA       | CO/1103/11                      | JX475256 | T | V | V |
| 559 | Red fox       | 2017 | Italy     | 51_FOX_2017_ITALY_SYLVATIC_FPLV | MT274377 | T | V | V |
| 560 | River otter   | 2019 | Canada    | OTVI-16/BC_2019                 | MN862748 | T | V | V |
| 561 | River otter   | 2019 | Canada    | OTVI-3/BC_2019                  | MN862749 | T | V | V |
| 562 | *             | 1986 | USA       | pEH20                           | PVFVP    | T | I | L |
| 563 | *             | 1990 | Australia | 193/70                          | X55115   | I | V | V |
| 564 | *             | 1990 | USA       | CU-4                            | PVFPVC   | I | V | V |
| 565 | *             | 1997 | Taiwan    | FPV-T1                          | AF015223 | I | I | V |
| 566 | *             | 2005 | China     | JF-3                            | DQ099431 | T | V | V |
| 567 | *             | 2005 | China     | ZF-5                            | DQ099430 | T | V | V |
| 568 | *             | 2006 | China     | HT-69                           | DQ474235 | T | V | V |
| 569 | *             | 2006 | China     | JF-1                            | DQ474236 | T | V | V |
| 570 | *             | 2006 | China     | SM-4                            | DQ474238 | T | I | V |
| 571 | *             | 2006 | China     | GT-3                            | DQ474237 | T | V | V |
| 572 | *             | 2006 | Japan     | AB262659                        | AB262659 | T | V | V |
| 573 | *             | 2007 | Argentina | ARG01                           | EU018145 | T | I | V |
| 574 | *             | 2007 | Argentina | ARG04                           | EU018142 | T | I | V |
| 575 | *             | 2007 | Argentina | ARG02                           | EU018144 | T | I | V |
| 576 | *             | 2007 | Argentina | ARG03                           | EU018143 | T | I | V |
| 577 | *             | 2018 | China     | FPLV-QDDX                       | MK301396 | T | V | V |
| 578 | *             | *    | *         | Gercules-Biocentr               | AY665655 | T | V | V |

\* It was not available in the GenBank data.
